# Supplementary material for: Interplay of cytoskeletal activity and lipid phase stability in dynamic protein recruitment and clustering
Source: PubMed Central journal article supplement — Sci Rep. 2013 Sep 10;3:2608. doi: 10.1038/srep02608 (PMC3767946; doi:10.1038/srep02608), 2013-09-10
Supplement: srep02608-s1.pdf [file srep02608-s1.pdf]

# Interplay of cytoskeletal activity and lipid phase stability in dynamic protein recruitment and clustering

*Jordi Gómez-Llobregat, Javier Buceta and Ramon Reigada*

**Movie S1.** The transient trapping of proteins in clusters can be observed in the sequence of snapshots corresponding to a simulated membrane of  $1 \mu\text{m}^2$  containing 50 nucleating active inclusions X (red) and 1000 diffusing P proteins (blue) in a lipid media (color code as in Fig. 5). The model parameters are  $\tau=0.5$  s,  $\lambda=3$ , and  $\alpha=0.5$ . The sequence covers 5 s of simulation. Inclusions attract and trap nearby mobile proteins, thus forming a nanocluster until the inclusion detaches from the membrane. When this happens, the nanocluster breaks up, proteins are dispersed, and another cluster is formed elsewhere at a new attachment point.
